# Supplementary material for: Comparison of Paraquat Herbicide Removal from Aqueous Solutions using Nanoscale Zero-Valent Iron-Pumice/Diatomite Composites
Source: Hindawi journal article supplement (doi:10.1155/2021/4319660), 2021-12-21
Supplement: f1 [file 4319660.f1.docx]

**Comparison of paraquat herbicide removal from aqueous solutions using**

**nanoscale zero-valent iron-pumice/Diatomite composites**

Abbas Khodabakhshi1, Fazel Mohammadi-Moghadam1, Mohammad Mehdi Amin2, Sara Hamati3, 4, Shakila hayarian5*

1Associate Professor, Department of Environmental Health Engineering, School of Health, Shahrekord University of Medical Sciences, Shahrekord, Iran.

2Mohammad Mehdi Amin, Professor of Environmental Health Engineering. Department of Environmental Health Engineering, School of Health.Isfahan. Iran.

3Ph.D Student of Environmental Health Engineering, School of Health, Shahrekord University of Medical Sciences, Shahrekord, Iran, 4 Student Research Committee, Shahrekord University of Medical Sciences, Shahrekord, Iran.

5🟋MSc Student in Environmental Health Engineering, School of Health, Shahrekord University of Medical Sciences, Shahrekord, Iran.

***Corresponding Author:** Shakila-hayarian **-** MSc Student in Environmental Health Engineering, Faculty of Health, Shahrekord University of Medical Sciences, Shahrekord, Iran. Phone: +989374079584, E-mail: shakila.hayarian@gmail.com

Table S1: Characteristics of paraquat

| Molecular structure | Molecular formula | Chemical name | Solubility in water(g L-1) | pH | Molecular weight |
| --- | --- | --- | --- | --- | --- |
| 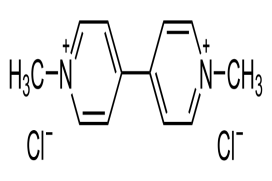 | C12H14N2Cl2 | 1- 1 dimethyl 4- 4- bipyridinium dichloride | 618 | 6.7-5.5 | 257.2 |

Table S2: Statistical parameters obtained from measuring size of 100 particles in the studied samples

| Sample | Number of measurements | Mean  (nm) | Standard deviation (nm) | The smallest measured particle (nm) | The largest measured particle (nm) |
| --- | --- | --- | --- | --- | --- |
| D-nZVI | 100 | 92.48 | 19.19 | 64.00 | 140.98 |
| P-nZVI | 100 | 77.99 | 16.04 | 47.76 | 110.97 |
